## ***R2d2* drives selfish sweeps in the house mouse**

John P Didion<sup>1,2,3\*</sup>, Andrew P Morgan<sup>1,2,3\*</sup>, Liran Yadgary<sup>1,2,3</sup>, Timothy A Bell<sup>1,2,3</sup>, Rachel C McMullan<sup>1,2,3</sup>, Lydia Ortiz de Solorzano<sup>1,2,3</sup>, Janice Britton-Davidian<sup>4</sup>, Carol J Bult<sup>5</sup>, Karl J Campbell<sup>6,7</sup>, Riccardo Castiglia<sup>8</sup>, Yung-Hao Ching<sup>9</sup>, Amanda J Chunco<sup>10</sup>, James J Crowley<sup>1</sup>, Elissa J Chesler<sup>5</sup>, John E French<sup>11</sup>, Sofia I Gabriel<sup>12</sup>, Daniel M Gatti<sup>5</sup>, Theodore Garland Jr.<sup>13</sup>, Eva B Giagia-Athanasopoulou<sup>14</sup>, Mabel D Giménez<sup>15</sup>, Sofia A Grize<sup>16</sup>, İslam Gündüz<sup>17</sup>, Andrew Holmes<sup>18</sup>, Heidi C Hauffe<sup>19</sup>, Jeremy S Herman<sup>20</sup>, James M Holt<sup>21</sup>, Kunjie Hua<sup>1</sup>, Wesley J Jolley<sup>22</sup>, Anna K Lindholm<sup>16</sup>, María J López-Fuster<sup>23</sup>, George Mitsainas<sup>14</sup>, Maria Mathias<sup>23</sup>, Leonard McMillan<sup>21</sup>, M Graça Ramalhinho<sup>23</sup>, Barbara Rehmann<sup>24</sup>, Stephan P Rosshart<sup>24</sup>, Jeremy B Searle<sup>12</sup>, Meng-Shin Shiao<sup>25</sup>, Emanuela Solano<sup>8</sup>, Karen L Svenson<sup>5</sup>, Pat Thomas-Laemont<sup>10</sup>, David W Threadgill<sup>26</sup>, Jacint Ventura Queija<sup>27</sup>, George M Weinstock<sup>28</sup>, Daniel Pomp<sup>1,3</sup>, Gary A Churchill<sup>5</sup>, Fernando Pardo-Manuel de Villena<sup>1,2,3</sup>

1. Department of Genetics, University of North Carolina at Chapel Hill, Chapel Hill, NC, US

2. Lineberger Comprehensive Cancer Center, University of North Carolina at Chapel Hill, Chapel Hill, NC, US

3. Carolina Center for Genome Science, University of North Carolina at Chapel Hill, Chapel Hill, NC, US

4. Institut des Sciences de l'Evolution, Université de Montpellier, CNRS, IRD, EPHE, Montpellier, FR

5. The Jackson Laboratory, Bar Harbor, ME, US
6. Island Conservation, Puerto Ayora, Galápagos Island, EC
7. School of Geography, Planning & Environmental Management, The University of Queensland, St Lucia, AU
8. Department of Biology and Biotechnologies "Charles Darwin", University of Rome "La Sapienza", Rome, IT
9. Institute of Zoology, National Taiwan University, Taipei, TW
10. Department of Environmental Studies, Elon University, Elon, NC, US
11. National Toxicology Program, National Institute of Environmental Sciences, NIH, Research Triangle Park, NC, US
12. Department of Ecology and Evolutionary Biology, Cornell University, Ithaca, NY, US
13. Department of Biology, University of California Riverside, Riverside, CA, US
14. Section of Animal Biology, Department of Biology, University of Patras, Patras, GR
15. Instituto de Biología Subtropical, CONICET & Universidad Nacional de Misiones, Posadas, MS, AR
16. Institute of Evolutionary Biology and Environmental Studies, University of Zurich, Zurich, CH
17. Department of Biology, Faculty of Arts and Sciences, University of Ondokuz Mayıs, Samsun, TU

18. Laboratory of Behavioral and Genomic Neuroscience, National Institute on Alcohol Abuse and Alcoholism, NIH, Bethesda, MD, US
  19. Department of Biodiversity and Molecular Ecology, Centre for Research and Innovation, Fondazione Edmund Mach, S. Michele all'Adige, TN, IT
  20. Department of Natural Sciences, National Museums Scotland, Edinburgh, UK
  21. Department of Computer Science, University of North Carolina at Chapel Hill, Chapel Hill, NC, US
  22. Island Conservation, Santa Cruz, CA, US
  23. Department of Animal Biology & Centre for Environmental and Marine Studies, Faculty of Science, University of Lisbon, Lisboa, PT
  24. Immunology Section, Liver Diseases Branch, National Institute of Diabetes and Digestive and Kidney Diseases, NIH, Bethesda, MD, US
  25. Research Center, Faculty of Medicine, Ramathibodi Hospital, Mahidol University, 10400, Thailand , Bangkok, TH
  26. Department of Veterinary Pathobiology and Department of Molecular and Cellular Medicine, Texas A&M University, College Station, TX, US
  27. Departament de Biologia Animal, Biologia Vegetal i Ecologia, Facultat de Ciències, Universitat Autònoma de Barcelona, Barcelona, ES
  28. Jackson Laboratory for Genomic Medicine, Farmington, CT, US
- \* These authors contributed equally to this work

## Introduction (256 words)

A selective sweep is the result of strong positive selection rapidly driving newly occurring or standing genetic variants to fixation, and can dramatically alter the pattern and distribution of allelic diversity in a population or species. Population-level sequencing data have enabled discoveries of selective sweeps associated with genes involved in recent adaptations in many species<sup>1-6</sup>. In contrast, much debate but little empirical evidence addresses whether “selfish” genes are capable of fixation – thereby leaving signatures identical to classical selective sweeps – despite being neutral or deleterious to organismal fitness<sup>7-11</sup>. We previously reported the discovery of *R2d2*, a large copy-number variant that causes non-random segregation of mouse Chromosome 2 in females due to meiotic drive<sup>12</sup>. Here we show population-genetic data consistent with a “selfish” sweep driven by alleles of *R2d2* with high copy number (*R2d2<sup>HC</sup>*) in natural populations of mice. We replicate this finding in multiple closed breeding populations from six outbred backgrounds segregating for *R2d2* alleles. We find that *R2d2<sup>HC</sup>* rapidly increases in frequency, and in most cases becomes fixed in significantly fewer generations than can be explained by genetic drift. *R2d2<sup>HC</sup>* is also associated with significantly reduced litter sizes in heterozygosity, making it a true selfish allele. Our data provide direct evidence of populations actively undergoing selfish sweeps, and demonstrate that meiotic drive can rapidly alter the genomic landscape in favor of mutations with neutral or even negative effects on overall Darwinian fitness. Further study will reveal the incidence of selfish

sweeps, and will elucidate the relative contributions of selfish genes, adaptation and genetic drift to evolution.

## **Main text (2072 words)**

With few exceptions<sup>13,14</sup>, evolution is viewed through the lens of history, by inference from the comparison of genetically distinct populations that are thought to share a common origin. A marked difference in local genetic diversity between closely related taxa might indicate that one lineage has undergone a sweep, in which a variant under strong positive selection rises in frequency and carries with it linked genetic variation (“genetic hitchhiking”), thereby reducing local haplotype diversity<sup>15,16</sup>.

In most reported sweeps, candidate regions contain genes whose roles in organismal fitness are obvious. Prominent examples of selective sweeps include alleles at the *Vkorc1* locus, which confers rodenticide resistance in the brown rat<sup>17</sup>, and enhancer polymorphisms conferring lactase persistence in human beings<sup>1</sup>. However, a few studies<sup>3,18</sup> have suggested the possibility of selfish sweeps, in which selfish alleles strongly promote their own transmission through a variety of mechanisms, including meiotic drive<sup>19</sup>, irrespective of their effects on overall fitness. Importantly, a selfish sweep would leave a genomic signature indistinguishable from that of a classic selective sweep.

We previously reported a novel meiotic drive responder locus (*R2d2*) whose core is a variably sized copy number gain on mouse Chromosome 2 that contains a single annotated gene, *Cwc22* (a spliceosomal protein). Females that are

heterozygous at *R2d2* preferentially transmit to their offspring the allele with high copy number ( $R2d2^{HC}$ ) relative to the allele with low copy number ( $R2d2^{LC}$ ) to an extent that depends on genetic background.  $R2d2^{HC}$  genotype is also either uncorrelated or negatively correlated with litter size – a major component of absolute fitness – depending on the presence of meiotic drive<sup>12</sup>.  $R2d2^{HC}$  therefore behaves as a selfish genetic element.

### ***Evidence for a selfish sweep in wild mouse populations***

A recent study<sup>20</sup> showed extreme copy number variation at *Cwc22* in a sample of 26 wild mice (*Mus musculus domesticus*). To determine whether this was indicative of *R2d2* copy number variation in the wild, we assayed an additional 396 individuals sampled from 14 European countries and the United States (**Supplementary Table 1** and **Supplementary Fig. 1A**). We found that  $R2d2^{HC}$  alleles are segregating at a wide range of frequencies in natural populations (0.00 – 0.67; **Supplementary Table 2**).

To test for a selfish sweep at  $R2d2^{HC}$ , we genotyped the wild-caught mice on the MegaMUGA array<sup>21,22</sup> and examined patterns of haplotype diversity. Conventional tests<sup>23,24</sup> failed to detect a sweep around *R2d2* (**Supplementary Fig. 2**). However, the power of these tests is limited when the favored allele is common in the ancestral population, when a sweep is ongoing and far from complete, or when the rate of recombination is high near the locus under selection<sup>25</sup>. In the case of very recent or strong positive selection, unrelated individuals are more likely to share extended segments identical by descent (IBD) in the vicinity of the selected locus<sup>26</sup>, compared with a population subject

only to genetic drift. Consistent with this prediction, we observed an extreme excess of shared IBD across populations around *R2d2* (**Figure 1A**): *R2d2* falls in the top 0.25% of IBD-sharing scores across the autosomes. In all cases, the shared haplotype has high copy number. Similarly strong signatures are also evident at a previously identified target of positive selection, the *Vkorc1* locus (distal Chromosome 7)<sup>27</sup>.

In principle, the strength and age of a sweep can be estimated from the extent of loss of genetic diversity around the locus under selection. From the SNP data, we identified a ~1 Mb haplotype with significantly greater identity between individuals with *R2d2*<sup>HC</sup> alleles compared to the surrounding sequence. We used published sequencing data from 26 wild mice<sup>20</sup> to measure local haplotype diversity around *R2d2* and found that the haplotypes associated with *R2d2*<sup>HC</sup> alleles are longer than those associated with *R2d2*<sup>LC</sup> (**Figure 1B-C**). This pattern of extended haplotype homozygosity is consistent with positive selection over an evolutionary timescale as short as 450 generations.

### ***A selfish sweep in an outbred laboratory population***

We validated the ability of *R2d2*<sup>HC</sup> to drive a selfish sweep by examining *R2d2* allele frequencies in multiple closed-breeding laboratory populations for which we had access to the founder populations. The Diversity Outbred (DO) is a randomized outbreeding population derived from eight inbred mouse strains that is maintained under conditions designed to minimize the effects of both selection and genetic drift<sup>28</sup>. Expected time to fixation or loss of an allele present in the founder generation (with initial frequency 1/8) is ~900 generations. The WSB/EiJ

founder strain contributed an  $R2d2^{HC}$  allele which underwent a more than three-fold increase (from 0.18 to 0.62) in 13 generations ( $p < 0.001$  by simulation; range 0.03 – 0.26 after 13 generations in 1000 simulation runs) (**Figure 2A**), accompanied by significantly distorted allele frequencies ( $p < 0.01$  by simulation) across a ~100 Mb region linked to the allele (**Figure 2B**).

### ***$R2d2^{HC}$ has an underdominant effect on fitness***

To assess the fitness consequences of  $R2d2^{HC}$  we treated litter size as a proxy for absolute fitness (**Figure 2C**). Average litter size among DO females homozygous for  $R2d2^{LC}$  (8.1; 95% CI 7.8 – 8.3) is not different than among females homozygous for  $R2d2^{HC}$  (8.8; 95% CI 7.3 – 10.2) or among heterozygous females without distorted transmission of  $R2d2^{HC}$  (8.1; 95% CI 7.7 – 8.5). However, in the presence of meiotic drive, litter size is markedly reduced (6.5; 95% CI 7.5 – 9.2;  $p = 9.6 \times 10^{-5}$  for test of difference versus all other classes). The relative fitness of heterozygous females with distorted transmission is  $w = 0.81$ , for a selection coefficient of  $s = 1 - w = 0.19$  (95% CI 0.10 – 0.23) against the heterozygote. Despite this underdominant effect, the absolute number of  $R2d2^{HC}$  alleles transmitted by heterozygous females in each litter is significantly higher in the presence of meiotic drive ( $p = 0.036$ ; **Figure 2D**). The rising frequency of  $R2d2^{HC}$  in the DO thus represents a truly selfish sweep.

### ***Selfish sweeps other laboratory populations***

We also observed selfish sweeps in selection lines derived from the ICR:Hsd outbred population<sup>29</sup>, in which  $R2d2^{HC}$  alleles are segregating (**Figure 3A**). Three of four lines selectively bred for high voluntary wheel-running (HR lines) and two



of four control lines (10 breeding pairs per line per generation in both conditions) went from starting  $R2d2^{HC}$  frequencies  $\sim 0.75$  to fixation in 60 generations or less: two lines were fixed by generation 20, and three more by generation 60. In simulations mimicking this breeding design and neutrality (**Supplementary Fig. 3**), median time to fixation was 46 generations (5th percentile: 9 generations). Although the  $R2d2^{HC}$  allele would be expected to eventually fix by drift in 6 of 8 lines given its high starting frequency, fixation in two lines within 20 generations and three more lines by 60 generations is not expected ( $p = 0.003$  by simulation). In a related advanced intercross segregating for high and low copy number alleles at  $R2d2$  (HR8xC57BL/6J<sup>30</sup>), we observed that  $R2d2^{HC}$  increased from a frequency of 0.5 to 0.85 in just 10 generations and fixed by 15 generations, versus a median 184 generations in simulations ( $p < 0.001$ ) (**Figure 3B**). The increase in  $R2d2^{HC}$  allele frequency in the DO and the advanced intercross populations occurred at least an order of magnitude faster than what is predicted by drift alone.

Using archival tissue samples, we were able to determine  $R2d2$  allele frequencies in the original founder populations of 6 of the  $\sim 60$  wild-derived inbred strains available for laboratory use<sup>31</sup>. In four strains, WSB/EiJ, WSA/EiJ, ZALENDE/EiJ, and SPRET/EiJ,  $R2d2^{HC}$  alleles were segregating in the founders and are now fixed in the inbred populations. In the other two strains, LEWES/EiJ and TIRANO/EiJ, the founders were not segregating for  $R2d2$  copy number and the inbred populations are fixed, as expected, for  $R2d2^{LC}$  (**Supplementary Fig. 4**). This trend in wild-derived strains is additional evidence of the tendency for

$R2d2^{HC}$  to go to fixation in closed breeding populations when segregating in the founder individuals.

### ***On the fate of $R2d2^{HC}$ alleles in the wild***

Considering the degree of transmission distortion in favor of  $R2d2^{HC}$  (up to 95%<sup>12</sup>), and that  $R2d2^{HC}$  repeatedly goes to fixation in laboratory populations, the moderate frequency of  $R2d2^{HC}$  in the wild (0.14 worldwide) is initially surprising. Four observations may explain this discrepancy. First, the reduction in litter size associated with  $R2d2^{HC}$  may have a greater impact on  $R2d2$  allele frequency in a natural population than in the controlled laboratory populations we studied. In these breeding schemes each mating pair contributes the same number of offspring to the next generation so that most fitness differences are effectively erased.

Second,  $R2d2^{HC}$  alleles may be unstable and lose the ability to drive upon reverting to low copy number. This has been reported previously<sup>12</sup>.

Third, in an infinite population (*i.e.* in the wild) the dynamics of an underdominant meiotic drive allele are only dependent on the relationship between the degree of transmission distortion ( $m$ ) and the strength of selection against heterozygotes<sup>33</sup> ( $s$ ). This relationship can be expressed by the quantity  $q$  (see **Online Methods**), for which  $q > 1$  indicates increasing probability of fixation of the driving allele,  $q < 1$  indicates increasing probability that the allele will be purged, and  $q \approx 1$  leads to maintenance of the allele at an (unstable) equilibrium frequency. The fate of the driving allele in a finite population additionally depends on the population size<sup>33</sup>: the smaller the population, the greater the likelihood that genetic drift will fix a

mutation with  $q < 1$  (**Supplementary Fig. 5A-B**). We note that  $R2d2^{HC}$  appears to exist close to the  $q \approx 1$  boundary ( $s \approx 0.2$  and  $m \approx 0.75$ ).

Finally, in contrast to many meiotic drive systems, in which the component elements are tightly linked, the action of  $R2d2^{HC}$  is dependent on genetic background at multiple unlinked “modifier” loci<sup>12</sup>. Modifier alleles are segregating in *M. m. domesticus*: distorted transmission has been observed in some crosses in which  $R2d2^{HC}$  alleles are present<sup>29,39</sup> in an *M. m. domesticus* background, but absent in others<sup>12</sup>. However the identities and effect sizes of these loci remain unknown, making it difficult to predict their effect on  $R2d2$  allele frequencies in the wild. We used forward-in-time simulations to explore the effect of a single unlinked modifier locus on fixation probability of a driving allele. Under an additive model ( $m = 0.80$  for modifier genotype *AA*,  $0.65$  for genotype *Aa* and  $0.50$  for genotype *aa*), fixation probability is reduced and time to fixation is increased by the presence of the modifier locus (**Supplementary Fig. 5C-D**). As the modifier allele becomes more rare, fixation probability approaches the neutral expectation ( $1/2N$ , where  $N$  is population size). Importantly, the driving allele tends to sweep until the modifier allele is lost, and then drifts either to fixation or loss (**Supplementary Fig. 6E**). Drift at modifier loci thus creates a situation akin to selection in a varying environment – one outcome of which is balancing selection<sup>34</sup>. This is consistent with the maintenance of  $R2d2^{HC}$  at intermediate frequencies in multiple populations separated by space and time, as we observe in wild mice.

## **Concluding remarks**

Although a selfish sweep has clear implications for such experimental populations as the DO and the Collaborative Cross<sup>12</sup>, the larger evolutionary implications of selfish sweeps are less obvious. On one hand, sweeps may be relatively rare, as appears to be the case for classic selective sweeps in recent human history<sup>35</sup>. On the other hand, theory and comparative studies indicate that centromeric variants can act as selfish elements subject to meiotic drive<sup>9,36</sup> and be a potent force during speciation<sup>8,19,33</sup>. The fate of a selfish sweep depends on the fitness costs associated with the different genotypic classes at the selfish genetic element. For example, maintenance of intermediate frequencies of the *t*-complex<sup>37</sup> and *Segregation Distorter*<sup>38</sup> chromosomes in natural populations of mice and *Drosophila*, respectively, is thought to result from decreased fecundity associated with those selfish elements. Further study will be required to elucidate the fitness effects of *R2d2*<sup>HC</sup> and its associated haplotype in the wild. Improved understanding of the mechanism of meiotic drive at *R2d2* raises the possibility of experimentally manipulating chromosome segregation in mammals.

Evolutionary dogma holds that a newly arising mutation's likelihood of becoming established, increasing in frequency and even going to fixation within a population is positively correlated with its effect on organismal fitness. Here, we have provided evidence of a selfish genetic element having repeatedly driven sweeps in which change in allele frequency and effect on organismal fitness are decoupled. This has broad implications for evolutionary studies: independent

evidence is required to determine whether loci implicated as drivers of selective sweeps are adaptive or selfish.

## Online Methods

### *Mice*

*Diversity Outbred (DO)*: All DO mice are bred at The Jackson Laboratory in waves (or “generations”) lasting ~3 months. Some offspring from each generation are used as founders for subsequent generations. Pedigrees are used to identify mating pairs that minimize the chances for natural selection to occur. Individual investigators purchased mice (**Supplementary Table 3**) for unrelated studies, and contributed either tissue samples or genotype data to this study. All mice were handled in accordance with the IACUC protocols of the investigators’ respective institutions. Litter sizes were counted within 24 hours of birth.

*High running (HR) selection lines*: The breeding and selection scheme of the HR lines is described elsewhere<sup>29</sup>. Briefly, two generations prior to selection (generation -2), offspring of a base population of ICR:Hsd outbred mice were randomly assigned to 112 mating pairs. The offspring of those pairs were used as founders for eight lines (10 breeding pairs per line). At each generation thereafter, within-family selection for voluntary wheel running was performed: the highest-running male and female from each family were randomly paired (avoiding sibling matings) to produce the next generation.

*HR8xC57BL/6J advanced intercross*: The production of the HR8xC57BL/6J advanced intercross is described elsewhere<sup>39,40</sup>. Briefly, at ~8 wk of age, progenitor HR8 mice (HR line #8, 44th generation of artificial selection for high voluntary wheel running) and C57BL/6J (B6) mice underwent a reciprocal cross

breeding protocol. 22 males and 22 females per line produced the F1 generation, and three subsequent generations (F2, G3, G4) were derived from the two reciprocal mating types (B6 males × HR8 females and B6 females × HR8 males). Once established, the two reciprocal cross-line populations were not mixed. In total, 32 mating pairs from each reciprocal cross population were established each generation. To avoid inbreeding and increase the effective population size, interfamilial matings were assigned each generation utilizing a Latin square design. Only one of the two reciprocal types (B6 females × HR8 males) was carried from G5 to G15 and subsequently utilized in the current study.

*Progenitors of wild-derived strains:* Details of the origins of wild-derived inbred strains are taken from Beck *et al.* (2000)<sup>41</sup>. Founder mice for the strain Watkins Star Lines A and B (WSA and WSB, respectively) were trapped near the town of Centreville, Maryland by Michael Potter (working at the National Cancer Institute) in 1976. WSA and WSB were selected for dark agouti coat color with white head blaze. In 1986 breeders were sent to Eva M. Eicher at The Jackson Laboratory, where the lines have been maintained since as WSA/EiJ and WSB/EiJ. The LEWES/EiJ strain is descended from wild mice trapped by Potter near Lewes, Delaware in 1981. Breeders were sent to Eicher at the Jackson Laboratory in 1995, where the line has been maintained since. The ZALENDE/EiJ and TIRANO/EiJ inbred strains are descended from mice trapped by Richard D. Sage near the villages of Zalende, Switzerland and Tirano, Italy respectively, in the vicinity of the Poschiavo Valley at the Swiss-Italian border. Mice from Sage's colony were transferred to Potter in 1981. A single breeding pair for each strain

was transferred to Eicher at The Jackson Laboratory in 1982. The SPRET/EiJ inbred strain was derived from wild *Mus spretus* mice trapped near Puerto Real, Cadiz province, Spain by Sage in 1978. The Jackson Laboratory's colony was initiated by Eicher from breeders transferred via Potter in 1983. Frozen tissues from animals in the founder populations were maintained at The Jackson Laboratory by Muriel Davidson until 2014, when they were transferred to the Pardo-Manuel de Villena laboratory at the University of North Carolina at Chapel Hill.

*Wild mice*: Trapping of wild mice was carried out in concordance with local laws, and either did not require approval or was carried out with the approval of the relevant regulatory bodies (depending on the locality and institution). Specifics of trapping and husbandry are detailed in (JPD, JBS, and FPMV in preparation).

### ***PCR genotyping at R2d2***

*HR selection lines*: To investigate the predicted sweep of the *R2d2*<sup>HC</sup> allele in the HR selection lines, we estimated *R2d2* allele frequencies at three generations, one before and two during artificial selection. We genotyped 185 randomly selected individuals from generation -2 and 157 individuals from generation +22 for a marker closely linked to *R2d2*. An additional 80 individuals from generation +61 were genotyped with the MegaMUGA array (see “Microarray genotyping and quality-control” below).

Crude whole-genomic DNA was extracted from mouse tails. The tissues were heated in 100 µl of 25 mM NaOH/0.2 mM EDTA at 95°C for 60 minutes followed



by the addition of 100  $\mu$ l of 40 mM Tris-HCl. The mixture was then centrifuged at 2000 x *g* for 10 minutes and the supernatant used as PCR template.

The *R2d2* element has been mapped to a 900 kb critical region on Chromosome 2: 83,631,096 – 84,541,308 (mm9 build), referred to herein as the “candidate interval”<sup>12</sup>. We designed primers to target a 318 bp region (chr2: 83,673,604 – 83,673,921) within the candidate interval with two distinct haplotypes in linkage with either the *R2d2*<sup>LC</sup> allele or the *R2d2*<sup>HC</sup> allele. Primers were designed using IDT PrimerQuest (<https://www.idtdna.com/Primerquest/Home/Index>). Final primer sequences were 5'-CCAGCAGTGATGAGTTGCCATCTTG-3' (forward) and 5'-TGTCACCAAGGTTTTCTTCCAAAGGGAA-3' (reverse).

PCR reactions contained 1  $\mu$ L dNTPs, 0.3  $\mu$ L of each primer, 5.3  $\mu$ L of water, and 0.1  $\mu$ L of GoTaq polymerase (Promega) in a final volume of 10  $\mu$ L. Cycling conditions were 95°C, 2-5 min, 35 cycles at 95°, 55° and 72°C for 30 sec each, with a final extension at 72°C, 7 min.

Products were sequenced at the University of North Carolina Genome Analysis Facility on an Applied Biosystems 3730XL Genetic Analyzer. Chromatograms were analyzed with the Sequencher software package (Gene Codes Corporation, Ann Arbor, Michigan, United States).

Assignment to haplotypes was validated by comparing the results to qPCR assays for the single protein-coding gene within *R2d2*, *Cwc22* (see “Copy-number assays” below). For generation +61, haplotypes were assigned based on MegaMUGA genotypes and validated by the normalized per-base read depth from whole-genome sequencing (see below), calculated with samtools mpileup<sup>42</sup>.

The concordance between qPCR, read depth, and haplotypes assigned by MegaMUGA or Sanger sequencing is shown in **Supplementary Fig. 7**.

*HR8xC57BL/6J advanced intercross line:* Tissues were obtained from breeding stock at generations 3, 5, 8, 9, 10, 11, 12, 13, 14, and 15. Crude whole-genomic DNA was extracted by the method described above. We designed primers to amplify a 518 bp region (chr2: 83,724,728 – 83,725,233) within the *R2d2* candidate interval. The amplicon is predicted, based on whole-genome sequencing, to contain a 169 bp deletion in HR8 relative to the C57BL/6J reference genome: 5'-GAGATTTGGATTTGCCATCAA-3' (forward) and 5'-GGTCTACAAGGACTAGAAACAG-3' (reverse). PCR reactions were carried out as described above. Products were visualized and scored on 2% agarose gels.

***Whole-genome sequencing of HR selection lines.*** Ten individuals from generation +61 of each of the eight HR selection lines were subject to whole-genome sequencing. Briefly, high-molecular-weight genomic DNA was extracted using a standard phenol/chloroform procedure. Illumina TruSeq libraries were constructed using 0.5 µg starting material, with fragment sizes between 300 and 500 bp. Each library was sequenced on one lane of an Illumina HiSeq2000 flowcell in a single 2x100bp paired-end run.

***Microarray genotyping and quality control.*** Whole-genomic DNA was isolated from tail, liver, muscle or spleen using Qiagen Gentra Puregene or DNeasy Blood & Tissue kits according to the manufacturer's instructions. All genome-wide genotyping was performed using the Mouse Universal Genotyping Array (MUGA) and its successor, MegaMUGA (GeneSeek, Lincoln, NE)<sup>22,43</sup>.

Genotypes were called using Illumina BeadStudio (Illumina Inc., Carlsbad, CA). We excluded all markers and all samples with missingness greater than 10%. We also computed the sum intensity for each marker:  $S_i = X_i + Y_i$ , where  $X_i$  and  $Y_i$  are the normalized hybridization intensities of the two allelic probes. We determined the expected distribution of sum intensity values using a large panel of control samples. We excluded any array for which the set of intensities  $I = \{S_1, S_2, \dots, S_n\}$  was not normally distributed or whose mean was significantly left-shifted with from the reference distribution (one-tailed  $t$ -test with  $p < 0.05$ ).

**Haplotype frequency estimation in the Diversity Outbred.** We inferred the haplotypes of DO individuals using probabilistic methods<sup>44,45</sup>. We combined the haplotypes of DO individuals genotyped in this study with the Generation 8 individuals in Didion *et al.* (2015). As an additional QC step, we computed the number of historical recombination breakpoints per individual per generation<sup>28</sup> and removed outliers (more than 1.5 standard deviations from the mean). Next, we excluded related individuals as follows. We used ValBreed<sup>46</sup> to perform a simulation of the DO breeding design for 15 generations to determine the distributions of pairwise haplotype identity between first-degree relatives, second-degree relatives, and unrelated individuals in each generation. We found that all distributions were normal and converged after three generations to mean  $0.588 \pm 0.045$  for first-degree relatives; mean  $0.395 \pm 0.039$  for second-degree relatives; and mean  $0.229 \pm 0.022$  for more distantly related individuals. We then computed the pairwise haplotype identity between all individuals, and identified pairs whose identity had a greater probability of belonging to the first- or second-

degree relative distributions than to the unrelated distribution. We iteratively removed the individuals with the greatest number of first- and second-degree relationships until no related individuals remained. Finally, we computed in each generation the frequency of each founder haplotype at 250 kb intervals surrounding the *R2d2* region (Chromosome 2: 78-86 Mb), and identified the greatest WSB/EiJ haplotype frequency.

**Copy-number assays and assignment of *R2d2* status.** Copy-number at *R2d2* was determined by qPCR for *Cwc22*, the single protein-coding gene in the *R2d2* repeat unit, as described in detail in Didion *et al.* (2015). Briefly, we used commercially available TaqMan kits (Life Technologies assay numbers Mm00644079\_cn and Mm00053048\_cn) to measure the copy number of *Cwc22* relative to the reference genes *Tfr3* (cat. no. 4458366, for target Mm00053048\_cn) or *Tert* (cat. no. 4458368, for target Mm00644079\_cn). Cycle thresholds ( $C_t$ ) were determined for each target using ABI CopyCaller v2.0 software with default settings, and relative cycle threshold was calculated as

$$\Delta C_t = C_t^{reference} - C_t^{target}$$

We normalized the  $\Delta C_t$  across batches by fitting a linear mixed model with batch and target-reference pair as random effects.

Estimation of integer diploid copy numbers  $> \sim 3$  by qPCR is infeasible without many technical and biological replicates, especially in the heterozygous state. We took advantage of *R2d2* diploid copy-number estimates from whole-genome sequencing for the inbred strains C57BL/6J (0), CAST/EiJ (2) and WSB/EiJ (66),

and the (WSB/EiJxC57BL/6J) $F_1$  (33) to establish a threshold for declaring a sample “high-copy.” For each of the two TaqMan target-reference pairs we calculated the sample mean ( $\hat{\mu}$ ) and standard deviation ( $\hat{\sigma}$ ) of the normalized  $\Delta C_t$  among CAST/EiJ controls and wild *M. m. castaneus* individuals together. We designated as “high-copy” any individual with normalized  $\Delta C_t$  greater than  $\hat{\mu} + 2\hat{\sigma}$  – that is, any individual with approximately > 95% probability of having diploid copy number >2 at *R2d2*. Individuals with high copy number and evidence of local heterozygosity (a heterozygous call at any of the 13 markers in the *R2d2* candidate interval) were declared heterozygous  $R2d2^{HC/LC}$ , and those with high copy number and no heterozygous calls in the candidate interval were declared homozygous  $R2d2^{HC/HC}$ .

**Analyses of fitness effects of  $R2d2^{HC}$  in the Diversity Outbred.** To assess the consequences of  $R2d2^{HC}$  for organismal fitness, we treated litter size as a proxy for absolute fitness. Using breeding data from 475 females from generations 13, 16, 18 and 19 of the DO, we estimated mean litter size in four genotype groups: females homozygous  $R2d2^{LC/LC}$ ; females heterozygous  $R2d2^{HC/LC}$  with transmission ratio distortion (TRD) in favor of the  $R2d2^{HC}$  allele; females heterozygous  $R2d2^{HC/LC}$  without TRD; and females homozygous  $R2d2^{HC/HC}$ . (The 126 heterozygous females were originally reported in ref. [12].) Group means were estimated using a linear mixed model with parity and genotype as fixed effects and a random effect for each female using the lme4 package for R. Confidence intervals were obtained by likelihood profiling and post-hoc comparisons were performed via *F*-tests, using the Kenward-Roger

approximation for the effective degrees of freedom. The mean number of  $R2d2^{HC}$  alleles transmitted per litter by heterozygous females with and without TRD was estimated from data in ref. [12] with a weighted linear model, using the total number of offspring per female as weights. Litter sizes are presented in **Supplementary Table 3**, and estimates of group mean litter sizes in **Figure 2C**.

**Exploration of population structure in wild mice.** The wild mice used in this study (**Supplementary Table 1**) are a subset of the Wild Mouse Genetic Survey and are characterized in detail elsewhere (JPD, JBS, and FPMV, in preparation). The majority (325 of a total  $n = 500$  mice) were trapped at sites across Europe and the Mediterranean basin (**Supplementary Fig. 1A**, upper panel) and in central Maryland and have predominantly *Mus musculus domesticus* ancestry. Additional *M. m. domesticus* populations were sampled from the Farallon Islands near San Francisco, California (20 mice) and Floreana Island in the Galapagos off the coast of Ecuador (15 mice). Of *M. m. domesticus* samples, 245 have the standard mouse karyotype ( $2n = 40$ ) and 226 carry Robertsonian fusion chromosomes ( $2n < 40$ )<sup>47</sup>. A set of 29 *M. m. castaneus* mice trapped in northern India and Taiwan (**Supplementary Fig. 1A**, lower panel) were included as an outgroup<sup>48</sup>.

Scans for signatures of positive selection based on patterns of haplotype-sharing assume that individuals are unrelated. We identified pairs of related individuals using the *IBS2\** ratio<sup>49</sup>, defined as  $HETHET / (HOMHOM + HETHET)$ , where *HETHET* and *HOMHOM* are the count of non-missing markers for which both individuals are heterozygous (share two alleles) and homozygous for opposite

alleles (share zero alleles), respectively. Pairs with  $IBS2^* < 0.75$  were considered unrelated. Among individuals which were a member of one or more unrelated pairs, we iteratively removed one sample at a time until no related pairs remained, and additionally excluded markers with minor-allele frequency  $< 0.05$  or missingness  $> 0.10$ . The resulting dataset contains genotypes for 396 mice at 58,283 markers.

Several of our analyses required that samples be assigned to populations. Because mice in the wild breed in localized demes and disperse only over short distances (on the order of hundreds of meters)<sup>50</sup>, it is reasonable to delineate populations on the basis of geography. We assigned samples to populations based on the country in which they were trapped. To confirm that these population labels correspond to natural clusters we performed two exploratory analyses of population structure. First, classical multidimensional scaling (MDS) of autosomal genotypes was performed with PLINK<sup>51</sup> (`--mdsplot --autosome`). The result is presented in **Supplementary Fig. 1B-C**, in which samples are colored by population. Second, we used TreeMix<sup>52</sup> to generate a population tree allowing for gene flow using the set of unrelated individuals. Autosomal markers were first pruned to reach a set in approximate linkage equilibrium (`plink --indep 25 1`). TreeMix was run on the resulting set using the *M. m. castaneus* samples as an outgroup and allowing up to 10 gene-flow edges (`treemix -root "cas" -k 10`). The result is presented in **Supplementary Fig. 1D**. The clustering of samples by population evident by MDS and the absence of long-branch attraction in the

population tree together indicate that our choices of population labels are biologically reasonable.

**Scans for selection in wild mice.** Two complementary statistics, hapFLK<sup>24</sup> and standardized iHS score<sup>23</sup>, were used to examine wild-mouse genotypes for signatures of selection surrounding *R2d2*. The hapFLK statistic is a test of differentiation of local haplotype frequencies between hierarchically-structured populations. It can be interpreted as a generalization of Wright's  $F_{ST}$  which exploits local LD. Its model for haplotypes is that of fastPHASE<sup>53</sup> and requires a user-specified value for the parameter  $K$ , the number of local haplotype clusters. We computed hapFLK in the set of unrelated individuals using *M. m. castaneus* samples as an outgroup for  $K = \{4, 8, 12, 16, 20, 24, 28, 32\}$  (hapflk --outgroup "cas" -k {K}) and default settings otherwise.

The iHS score (and its allele-frequency-standardized form |iHS|) is a measure of extended haplotype homozygosity on a derived haplotype relative to an ancestral one. For consistency with the hapFLK analysis, we used fastPHASE on the same genotypes over the same range of  $K$  with 10 random starts and 25 iterations of expectation-maximization (fastphase -K{K} -T10 -C25) to generate phased haplotypes. We then used selscan<sup>54</sup> to compute iHS scores (selscan --ihs) and standardized the scores in 25 equally-sized bins (selscan-norm --bins 25).

Values in the upper tail of the genome-wide distribution of hapFLK or |iHS| represent candidates for regions under selection. We used percentile ranks directly and did not attempt to calculate approximate or empirical  $p$ -values.



**Detection of identity-by-descent (IBD) in wild mice.** As an alternative test for selection we computed density of IBD-sharing using the RefinedIBD algorithm of BEAGLE v4.0 (r1399)<sup>55</sup>, applying it to the full set of 500 individuals. The haplotype model implemented in BEAGLE uses a tuning parameter (the “scale” parameter) to control model complexity: larger values enforce a more parsimonious model, increasing sensitivity and decreasing computational cost at the expense of accuracy. The authors recommend a value of 2.0 for ~1M SNP arrays in humans. We increased the scale parameter to 5.0 to increase detection power given (a) our much sparser marker set (77,808 SNPs), and (b) the relatively weaker local LD in mouse versus human populations<sup>56</sup>. We trimmed one marker from the ends of candidate IBD segments to reduce edge effects (java -jar beagle.jar ibd=true ibdscale=5 ibdtrim=1). We retained those IBD segments shared between individuals in the set of 396 unrelated mice. In order to limit noise from false-positive IBD segments, we further removed segments with LOD score < 5.0 or width < 0.5 cM.

An empirical IBD-sharing score was computed in 500 kb bins with 250 kb overlap as:

$$f_n = \frac{\sum s_{ij} p_{ij}}{w_{ij}}$$

where the sum in the numerator is taken over all IBD segments overlapping bin  $n$  and  $s_{ij}$  is an indicator variable which takes the value 1 if individuals  $i, j$  share a haplotype IBD in bin  $n$  and 0 otherwise. The weighting factor  $w_{ij}$  is defined as

$$w_{ij} = 0.001 \times \left( \frac{n_a n_b}{W} \right)^{1/2}$$

with

$$W = \max(n_a n_b)$$

where  $n_a$  and  $n_b$  are the number of unrelated individuals in the population to which individuals  $i$  and  $j$  belong, respectively. This weighting scheme accounts for the fact that we oversample some geographic regions (for instance, Portugal and Maryland) relative to others. To explore differences in haplotype-sharing within versus between populations we introduce an additional indicator  $p_{ij}$ . Within-population sharing is computed by setting  $p_{ij} = 1$  if individuals  $i, j$  are drawn from the same population and  $p_{ij} = 0$  otherwise. Between-population sharing is computed by reversing the values of  $p_{ij}$ . The result is displayed in **Figure 2**.

***Analysis of local sequence diversity in whole-genome sequence from wild mice.*** We obtained raw sequence reads for 26 unrelated wild mice from<sup>20</sup> (European Nucleotide Archive project accession PRJEB9450; samples listed in **Supplementary Table 4**) and aligned it to the mouse reference genome (GRCm38/mm10 build) using bwa mem with default parameters. SNPs relative to the reference sequence of Chromosome 2 were called using samtools mpileup v0.1.19-44428cd with maximum per-sample depth of 200. Genotype calls with root-mean-square mapping quality < 30 or genotype quality >20 were treated as missing. Sites were used for phasing if they had a minor-allele count  $\geq 2$  and at most 2 missing calls. BEAGLE v4.0 (r1399) was used to phase the samples conditional on each other, using 20 iterations for phasing and default settings

otherwise (java -jar beagle.jar phasing-its=20). Sites were assigned a genetic position by linear interpolation on the most recent genetic map for the mouse<sup>44,45</sup>.

The *R2d2* candidate interval spans positions 83,790,939 – 84,701,151 in the mm10 reference sequence. As the index SNP for *R2d2*<sup>HC</sup> we chose the SNP with strongest nominal association with *R2d2* copy number (as estimated by Pezer *et al.* (2015)) within 1 kb of the proximal boundary of the candidate interval. That SNP is chr2:83,790,275T>C. The C allele is associated with high copy number and is therefore presumed to be the derived allele. We computed the extended haplotype homozygosity (EHH) statistic<sup>57</sup> in the phased dataset over a 1 Mb window on each side of the index SNP using selscan (selscan --ehh --ehh-win 1000000). The result is presented in **Figure 1B**. Decay of haplotypes away from the index SNP was visualized as a bifurcation diagram (**Figure 1C**) using code adapted from the R package rehh (<https://cran.r-project.org/package=rehh>).

**Estimation of age of *R2d2*<sup>HC</sup> alleles in wild mice.** To obtain a lower bound for the age of *R2d2*<sup>HC</sup> and its associated haplotype, we used the method of Stephens *et al.* (1998)<sup>58</sup>. Briefly, this method approximates the probability  $P$  that a haplotype is affected by recombination or mutation during the  $G$  generations since its origin as

$$P = e^{-G(-\mu+r)}$$

where  $\mu$  and  $r$  are the per-generation rates of mutation and recombination, respectively. Assuming  $\mu \ll r$  and, taking  $P'$ , the observed number of ancestral (non-recombined) haplotypes in a sample, as an estimator of  $P$ , obtain the following expression for  $G$ :

$$G \approx -(\log P')/r$$

We enumerated haplotypes in our sample of 52 chromosomes at 3 SNPs spanning the *R2d2* candidate interval. The most proximal SNP is the index SNP for the EHH analyses (chr2:83,790,275T>C); the most distal SNP is the SNP most associated with copy number within 1 kbp of the boundary of the candidate interval (chr2:84,668,280T>C); and the middle SNP was randomly-chosen to fall approximately halfway between (chr2:84,079,970C>T). The three SNPs span genetic distance 0.154 cM (corresponding to  $r = 0.00154$ ). The most common haplotype among samples with high copy number according to Pezer et al. was assumed to be ancestral. Among 52 chromosomes, 22 carried at least part of the *R2d2*<sup>HC</sup>-associated haplotype; of those, 11 were ancestral and 11 recombinant (**Supplementary Table 4**). This gives an estimated age of 450 generations for *R2d2*<sup>HC</sup>.

It should be noted that the approximations underlying this model assume constant population size and neutrality. To the extent that haplotype homozygosity decays more slowly on a positively- (or selfishly-) selected haplotype, we will underestimate the true age of *R2d2*<sup>HC</sup>.

**Null simulations of closed breeding populations.** Widespread fixation of alleles due to drift is expected in small, closed populations such as the HR lines or the HR8xC57BL/6J advanced intercross line. But even in these scenarios, an allele under positive selection is expected to fix 1) more often than expected by drift alone in repeated breeding experiments using the same genetic backgrounds, and 2) more rapidly than expected by drift alone. We used the R

package `simcross` (<https://github.com/kbroman/simcross>) to obtain the null distribution of fixation times and fixation probabilities for an HR line under Mendelian transmission.

We assume that the artificial selection applied for voluntary exercise in the HR lines (described in Swallow *et al.* (1998)) was independent of *R2d2* genotype. This assumption is justified for two reasons. First, 3 of 4 selection lines and 2 of 4 control (unselected) lines fixed *R2d2<sup>HC</sup>*. Second, at the fourth and tenth generation of the HR8xC57BL/6J advanced intercross, no quantitative trait loci (QTL) associated with the selection criteria (total distance run on days 5 and 6 of a 6-day trial) were found on Chromosome 2. QTL for peak and average running speed were identified at positions linked to *R2d2*; however, HR8 alleles at those QTL were associated with decreased, not increased, running speed<sup>39,40</sup>.

Without artificial selection an HR line reduces to an advanced intercross line maintained by avoidance of sib-mating. We therefore simulated 100 replicates of an advanced intercross with 10 breeding pairs and initial focal allele frequency 0.75. Trajectories were followed until the focal allele was fixed or lost. As a validation we confirmed that the focal allele was fixed in 754 of 1000 runs, not different from the expected 750 ( $p = 0.62$ , binomial test). Simulated trajectories and the distribution of sojourn times are presented in **Supplementary Fig. 3A-B**.

The HR8xC57BL/6J advanced intercross line was simulated as a standard biparental AIL with initial focal allele frequency of 0.5. Again, 1000 replicates of an AIL with 20 breeding pairs were simulated and trajectories were followed until

the focal allele was fixed or lost. The result is presented in **Supplementary Fig. 3C-D**.

**Investigation of population dynamics of meiotic drive.** We used two approaches to investigate the population dynamics of a female-limited meiotic drive system with selection against the heterozygote. First, we evaluated the fixation probability of a driving allele in relationship to transmission ratio ( $m$ ), selection coefficient against the heterozygote ( $s$ ) and population size ( $N$ ) by modeling the population as a discrete-time Markov chain whose states are possible counts of the driving allele. Define  $p_{t+1}$  to be the expected frequency of the driving allele in generation  $t+1$  given its frequency in the previous generation ( $p_t$ ). Following ref [33], the expression for  $p_{t+1}$  is

$$p_{t+1} = \frac{(1-s)(1+2m)p_t(1-p_t) + 2(1-p_t)^2}{2[1-2sp_t(1-p_t)]}$$

In an infinite population, the equilibrium behavior of the system is governed by the quantity  $q$ :

$$q = \frac{1}{2}(1-s)(1+2m)$$

When  $q > 1$ , the driving allele always increases in frequency. For values of  $q \approx 1$  and smaller, the driving allele is either lost or reaches an unstable equilibrium frequency determined  $m$  and  $s$ .

Let  $\mathbf{M}$  be the of transition probabilities for the Markov chain with  $2N+1$  states corresponding to possible counts of the driving allele in the population ( $0, \dots, 2N$ ).

The entries  $m_{ij}$  of  $\mathbf{M}$  are

$$m_{ij} = \binom{2N}{i} (1 - p_{t+1})^{2N-i} (p_{t+1})^i$$

Given a vector  $\mathbf{p}_0$  of starting probabilities, the probability distribution at generation  $t$  is obtained by iteration:

$$\mathbf{p}_t = \mathbf{p}_0 \mathbf{M}^t$$

We initiated the chain with a single copy of the driving allele (*i.e.*  $\mathbf{p}_0[1] = 1$ ). Since this Markov chain has absorbing states (namely allele counts 0 and  $2N$ ), we approximated steady-state probabilities by iterating the chain until the change in probabilities between successive generations was  $< 10^{-4}$ . Fixation probability is given by the value of the entry  $\mathbf{p}_t[2N]$  at convergence. We evaluated all possible combinations of  $0.5 \leq m \leq 1.0$  (in steps of 0.1) and  $0 \leq s \leq 0.3$  (in steps of 0.05).

To investigate the effects of modifier loci on the frequency trajectory of a driving allele we used forward-in-time simulations under a Wright-Fisher model with selection, implemented in Python. Simulations assumed a constant population size of  $2N = 200$  chromosomes, each 100 cM long, with balanced sex ratio. At the beginning of each run a driving allele was introduced (at 50 cM) on a single, randomly-chosen chromosome. Modifier alleles were introduced into the population independently at a specified frequency, at position 0.5 cM (*ie.* unlinked to the driving allele). To draw the next generation, an equal number of male and female parents were selected (with replacement) from the previous generation according to their fitness. Among females heterozygous for the driving allele, transmission ratio ( $m$ ) was calculated according to genotype at the modifier loci (if any); for males and homozygous females,  $m = 0.5$ . Individuals

were assigned a relative fitness of 1 if  $m = 0.5$  and 0.8 if  $m > 0.5$ . Recombination was simulated under the Haldane model (*i.e.* a Poisson process along chromosomes with no crossover interference.) Finally, for each individual in the next generation, one chromosome was randomly chosen from each parent with probability  $m$ .

Simulation runs were restarted when the driving allele was fixed or lost, until 100 fixation events were observed in each condition of interest. Probability of fixation was estimated using the waiting time before each fixation event, assuming a geometric distribution of waiting times, using the `fitdistr()` function in the R package MASS. Simulations are summarized in **Supplementary Fig. 5**.

**Haplotype analysis around *R2d2* in laboratory strains.** We used the Mouse Phylogeny Viewer (<http://msub.csbio.unc.edu/>)<sup>48</sup> to investigate the extent of haplotype-sharing around *R2d2* in inbred strains of *M. musculus*. First we identified the largest interval containing *R2d2* within which the classical inbred strains carrying *R2d2*<sup>HC</sup> alleles (ALR/LtJ, ALS/LtJ, CHMU/LeJ, NU/J) all have the same phylogenetic history: this core interval is Chr2: 82,284,942 – 84,870,179. (Note that individual pairs within that set, *eg.* CHMU/LeJ and ALS/LtJ, share over a longer region.) Next we obtained genotypes for the region Chr2: 75 – 90 Mb from the Mouse Diversity Array (<http://cgd.jax.org/datasets/diversityarray/CELfiles.shtml>) for the other four classical inbred strains plus other inbred strains with *R2d2*<sup>HC</sup> alleles: the selection line HR8 and wild-derived strains RBA/DnJ, RBB/DnJ, RBF/DnJ, WSB/EiJ and ZALLENDE/EiJ. We treated WSB/EiJ as the template haplotype and recoded



genotypes at each of 2,956 markers as 0, 1 or 2 according to the number of alleles shared with WSB/EiJ. Haplotype-sharing among the wild-derived strains was then assessed by manual inspection. Since the classical inbred strains share a single ancestral haplotype in the core region, and that haplotype is identical to WSB/EiJ, it follows that the wild-derived strains identical to WSB/EiJ share the same haplotype.

## References

1. Bersaglieri, T. *et al.* Genetic signatures of strong recent positive selection at the lactase gene. *Am J Hum Genet* **74**, 1111–1120 (2004).
2. Williamson, S. H. *et al.* Localizing recent adaptive evolution in the human genome. *PLoS Genet* **3**, e90 (2007).
3. Presgraves, D. C., Gérard, P. R., Cherukuri, A. & Lyttle, T. W. Large-scale selective sweep among segregation distorter chromosomes in African populations of *Drosophila melanogaster*. *PLoS Genet* **5**, e1000463 (2009).
4. Staubach, F. *et al.* Genome patterns of selection and introgression of haplotypes in natural populations of the house mouse (*Mus musculus*). *PLoS Genet* **8**, e1002891 (2012).
5. Grossman, S. R. *et al.* Identifying recent adaptations in large-scale genomic data. *Cell* **152**, 703–713 (2013).
6. Colonna, V. *et al.* Human genomic regions with exceptionally high levels of population differentiation identified from 911 whole-genome sequences. *Genome Biol* **15**, R88 (2014).
7. Sandler, L. & Novitski, E. Meiotic drive as an evolutionary force. *American Naturalist* 105–110 (1957).
8. White, M. J. D. *Modes of Speciation*. (W.H.Freeman & Co Ltd, 1978).
9. Henikoff, S. & Malik, H. S. Centromeres: selfish drivers. *Nature* **417**, 227–227 (2002).
10. Pardo-Manuel de Villena, F. in *Mammalian Genomics* (eds. Ruvinsky, A. & Graves, J. A. M.) 317–348 (CABI, 2004).
11. Derome, N., Métayer, K., Montchamp-Moreau, C. & Veuille, M. Signature of selective sweep associated with the evolution of sex-ratio drive in *Drosophila simulans*. *Genetics* **166**, 1357–1366 (2004).
12. Didion, J. P. *et al.* A multi-megabase copy number gain causes maternal transmission ratio distortion on mouse chromosome 2. *PLoS Genet* **11**, e1004850 (2015).
13. Garland, T. & Rose, M. R. *Experimental Evolution*. (2009).
14. Barrick, J. E. & Lenski, R. E. Genome dynamics during experimental evolution. *Nat Rev Genet* **14**, 827–839 (2013).
15. Smith, J. M. & Haigh, J. The hitch-hiking effect of a favourable gene. *Genet Res* **23**, 23–35 (1974).
16. Kaplan, N. L., Hudson, R. R. & Langley, C. H. The ‘hitchhiking effect’ revisited. *Genetics* **123**, 887–899 (1989).
17. Pelz, H.-J. *et al.* The genetic basis of resistance to anticoagulants in rodents. *Genetics* **170**, 1839–1847 (2005).

18. Axelsson, E. *et al.* Segregation distortion in chicken and the evolutionary consequences of female meiotic drive in birds. *Heredity* **105**, 290–298 (2010).
19. Brandvain, Y. & Coop, G. Scrambling eggs: meiotic drive and the evolution of female recombination rates. *Genetics* **190**, 709–723 (2011).
20. Pezer, Ž., Harr, B., Teschke, M., Babiker, H. & Tautz, D. Divergence patterns of genic copy number variation in natural populations of the house mouse (*Mus musculus domesticus*) reveal three conserved genes with major population-specific expansions. *Genome Res* (2015). doi:10.1101/gr.187187.114
21. Rogala, A. R. *et al.* The Collaborative Cross as a resource for modeling human disease: CC011/Unc, a new mouse model for spontaneous colitis. *Mamm Genome* **25**, 95–108 (2014).
22. Morgan, A. P. & Welsh, C. E. Informatics resources for the Collaborative Cross and related mouse populations. *Mamm Genome* (2015). doi:10.1007/s00335-015-9581-z
23. Voight, B. F., Kudaravalli, S., Wen, X. & Pritchard, J. K. A map of recent positive selection in the human genome. *PLoS Biol* **4**, e72 (2006).
24. Fariello, M. I., Boitard, S., Naya, H., SanCristobal, M. & Servin, B. Detecting signatures of selection through haplotype differentiation among hierarchically structured populations. *Genetics* **193**, 929–941 (2013).
25. Messer, P. W. & Petrov, D. A. Population genomics of rapid adaptation by soft selective sweeps. *Trends Ecol Evol* **28**, 659–669 (2013).
26. Albrechtsen, A., Moltke, I. & Nielsen, R. Natural selection and the distribution of identity-by-descent in the human genome. *Genetics* **186**, 295–308 (2010).
27. Song, Y. *et al.* Adaptive introgression of anticoagulant rodent poison resistance by hybridization between old world mice. *Curr Biol* **21**, 1296–1301 (2011).
28. Svenson, K. L. *et al.* High-resolution genetic mapping using the Mouse Diversity outbred population. *Genetics* **190**, 437–447 (2012).
29. Swallow, J. G., Carter, P. A. & Garland, T., Jr. Artificial selection for increased wheel-running behavior in house mice. *Behavior Genetics* **28**, 227–237 (1998).
30. Kelly, S. A. *et al.* Parent-of-origin effects on voluntary exercise levels and body composition in mice. *Physiol. Genomics* **40**, 111–120 (2010).
31. Didion, J. P. & Pardo-Manuel de Villena, F. Deconstructing *Mus gemischus*: advances in understanding ancestry, structure, and variation in the genome of the laboratory mouse. *Mamm Genome* **24**, 1–20 (2013).
32. Nachman, M. W., Boyer, S. N., Searle, J. B. & Aquadro, C. F.

- Mitochondrial DNA variation and the evolution of Robertsonian chromosomal races of house mice, *Mus domesticus*. *Genetics* **136**, 1105–1120 (1994).
33. Hedrick, P. W. The establishment of chromosomal variants. *Evolution* **35**, 322–332 (1981).
  34. Gillespie, J. H. *Population genetics: a concise guide*. (JHU Press, 2010).
  35. Hernandez, R. D. *et al.* Classic selective sweeps were rare in recent human evolution. *Science* **331**, 920–924 (2011).
  36. Pardo-Manuel de Villena, F. & Sapienza, C. Nonrandom segregation during meiosis: the unfairness of females. *Mamm Genome* **12**, 331–339 (2001).
  37. Lyon, M. F. The genetic basis of transmission-ratio distortion and male sterility due to the t complex. *The American Naturalist* **137**, 349–358 (1991).
  38. Hartl, D. L. Complementation analysis of male fertility among the segregation distorter chromosomes of *Drosophila melanogaster*. *Genetics* **73**, 613–629 (1973).
  39. Kelly, S. A. *et al.* Genetic architecture of voluntary exercise in an advanced intercross line of mice. *Physiol. Genomics* **42**, 190–200 (2010).
  40. Leamy, L. J., Kelly, S. A., Hua, K. & Pomp, D. Exercise and diet affect quantitative trait loci for body weight and composition traits in an advanced intercross population of mice. *Physiol. Genomics* **44**, 1141–1153 (2012).
  41. Beck, J. A. *et al.* Genealogies of mouse inbred strains. *Nat Genet* **24**, 23–25 (2000).
  42. Li, H. *et al.* The Sequence Alignment/Map format and SAMtools. *Bioinformatics* **25**, 2078–2079 (2009).
  43. Collaborative Cross Consortium. The genome architecture of the Collaborative Cross mouse genetic reference population. *Genetics* **190**, 389–401 (2012).
  44. Liu, E. Y., Zhang, Q., McMillan, L., Pardo-Manuel de Villena, F. & Wang, W. Efficient genome ancestry inference in complex pedigrees with inbreeding. *Bioinformatics* **26**, i199–207 (2010).
  45. Liu, E. Y. *et al.* High-resolution sex-specific linkage maps of the mouse reveal polarized distribution of crossovers in male germline. *Genetics* **197**, 91–106 (2014).
  46. Kover, P. X. *et al.* A Multiparent Advanced Generation Inter-Cross to fine-map quantitative traits in *Arabidopsis thaliana*. *PLoS Genet* **5**, e1000551 (2009).
  47. Piálek, J., Hauffe, H. C. & Searle, J. B. Chromosomal variation in the house mouse. *Biological Journal of the Linnean Society* **84**, 535–563

(2005).

48. Yang, H. *et al.* Subspecific origin and haplotype diversity in the laboratory mouse. *Nat Genet* **43**, 648–655 (2011).
49. Stevens, E. L. *et al.* Inference of relationships in population data using identity-by-descent and identity-by-state. *PLoS Genet* **7**, e1002287 (2011).
50. Pocock, M., Hauffe, H. C. & Searle, J. B. Dispersal in house mice. *Biological Journal of the Linnean Society* **84**, 565–583 (2005).
51. Purcell, S. *et al.* PLINK: a tool set for whole-genome association and population-based linkage analyses. *Am J Hum Genet* **81**, 559–575 (2007).
52. Pickrell, J. K. & Pritchard, J. K. Inference of population splits and mixtures from genome-wide allele frequency data. *PLoS Genet* **8**, e1002967 (2012).
53. Scheet, P. A fast and flexible statistical model for large-scale population genotype data: applications to inferring missing genotypes and haplotypic phase. *Am J Hum Genet* **78**, 629–644 (2006).
54. Szpiech, Z. A. & Hernandez, R. D. selscan: an efficient multithreaded program to perform EHH-based scans for positive selection. *Mol Biol Evol* **31**, 2824–2827 (2014).
55. Browning, B. L. & Browning, S. R. Improving the accuracy and efficiency of identity-by-descent detection in population data. *Genetics* **194**, 459–471 (2013).
56. Laurie, C. C. *et al.* Linkage disequilibrium in wild mice. *PLoS Genet* **3**, e144 (2007).
57. Sabeti, P. C. *et al.* Detecting recent positive selection in the human genome from haplotype structure. *Nature* **419**, 832–837 (2002).
58. Stephens, J. C. *et al.* Dating the origin of the CCR5-Delta32 AIDS-resistance allele by the coalescence of haplotypes. *Am J Hum Genet* **62**, 1507–1515 (1998).
59. Kimura, M. & Ohta, T. The average number of generations until fixation of a mutant gene in a finite population. *Genetics* **61**, 763–771 (1969).

## Acknowledgements

We wish to thank all the scientists and research personnel who collected and processed the samples used in this study. In particular we acknowledge Luanne Peters and Alex Hong-Tsen Yu for providing critical samples; Ryan Buus and T. Justin Gooch for isolating DNA for high-density genotyping of wild-caught mice; and Vicki Cappa, A. Cerveira, Daniel Förster, G. Ganem, Ron and Annabelle Leshner, K. Saïd, Toni Schelts, Dan Small, and J. Tapisso for aiding in mouse trapping. We thank Muriel Davisson at the Jackson Laboratory for maintaining, for several decades, tissue samples from breeding colonies used to derive wild-derived inbred strains. We also thank Francis Collins, Jim Evans, Matthew Hahn, and Corbin Jones for comments on an earlier version of this manuscript. This work was funded in part by T32GM067553 (JPD, APM), F30MH103925 (APM); Vaadia-BARD Postdoctoral Fellowship Award FI-478-13 (LY); W81XWH-11-1-0762 (CJB); University of Rome “La Sapienza” (RC, ES); The Jackson Laboratory new investigator funds (EJC); P50GM076468 (EJC, GAC and FPMV); K01MH094406 (JJC); CNRS (JBD); NSF IOS-1121273 (TG); Claraz-Stiftung (AL); PRDC/BIA-EVF/116884/2010 and UID/AMB/50017/2013 (MM, JBS); the intramural research program of NIDDK, NIH (BR and SPR); DK-076050, DK-056350 (DP); and a grant to The Jackson Laboratory’s Nathan Shock Center, AG038070 (GAC), and the Oliver Smithies Investigator funds provided by the School of Medicine at University of North Carolina (FPMV).

## Author Contributions

JPD, GAC and FPMV conceived the study. JBD, CJB, KJC, RC, Y-HC, AJC, JJC, EJC, JEF, SIG, DMG, TG, EBG-A, MDG, SAG, IG, AH, HCH, JSH, JMH, KH, WJJ, AKL, MJL-F, GM, MM, LM, MGR, BR, SPR, JBS, MSS, ES, KLS, PT-L, DWT, JVQ, GMW, DP, GAC, and FPMV provided biological samples and/or unpublished data sets. APM, LY, TAB, RCM, and LOdS conducted experiments. JPD, APM, and LY analyzed the data. JPD, APM, and FPMV wrote the paper.

## Author Information

All data is made available at <http://csbio.unc.edu/r2d2/>. The authors declare no competing financial interests. Correspondence and requests for materials should be addressed to FPMV ([fernando@med.unc.edu](mailto:fernando@med.unc.edu)).

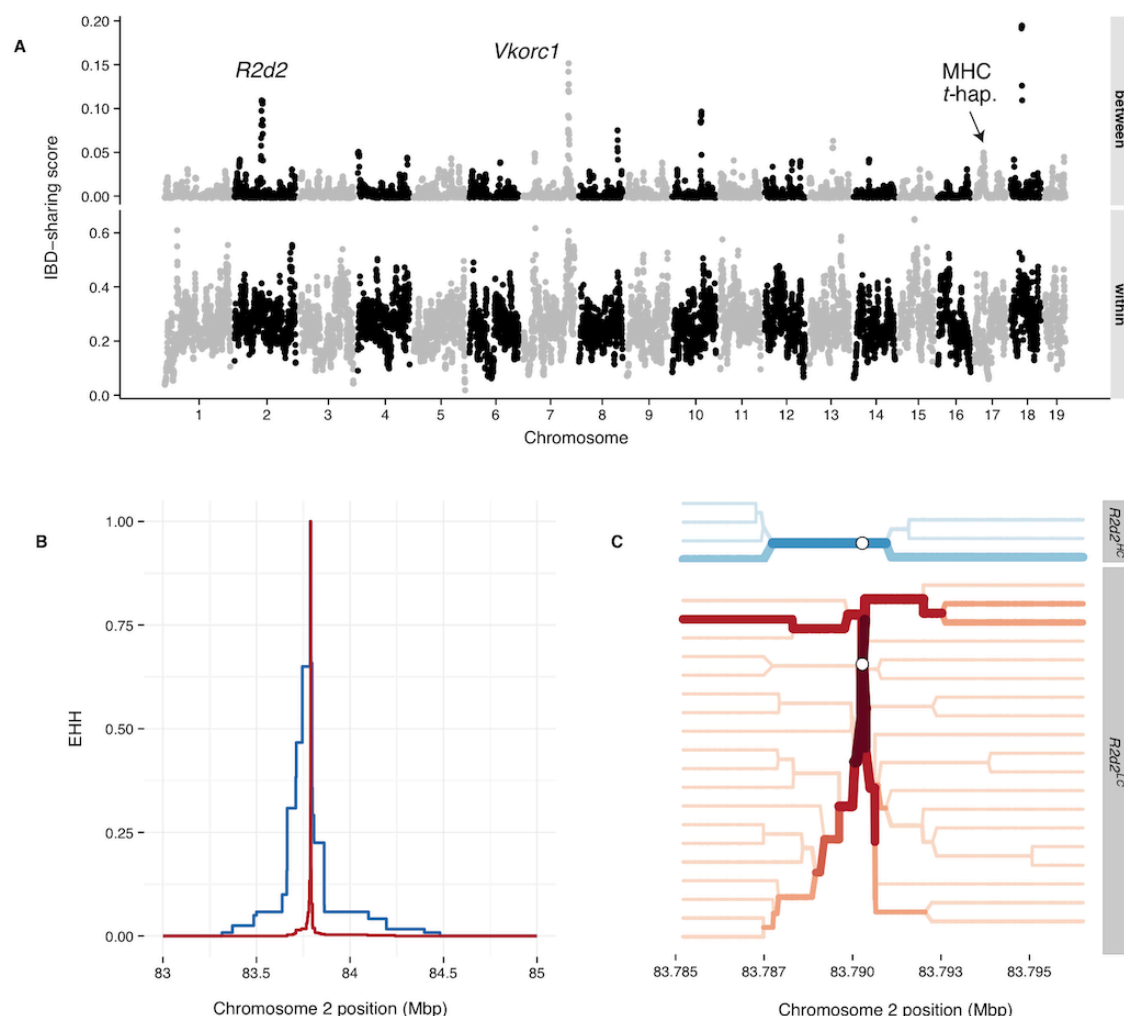

**Figure 1. Haplotype-sharing at *R2d2* provides evidence of a selective sweep in wild mice of European origin. (A)** Weighted haplotype-sharing score (see **Online Methods**), computed in 500 kb bins across autosomes, when those individuals are drawn from the same population (lower panel) or different populations (upper panel). Peaks of interest overly *R2d2* (Chromosome 2; see **Supplementary Fig. 7** for zoomed-in view) and *Vkorc1* (distal Chromosome 7). The position of the closely-linked *t*-haplotype and MHC loci is also marked. **(B)** Decay of extended haplotype homozygosity (EHH)<sup>57</sup> on the *R2d2*<sup>HC</sup>-associated (blue) versus the *R2d2*<sup>LC</sup>-associated (red) haplotype. EHH is measured outward



from the index SNP at chr2:83,790,275 and is bounded between 0 and 1. **(C)**

Haplotype bifurcation diagrams for the  $R2d2^{HC}$  (top panel, red) and  $R2d2^{LC}$  (bottom panel, blue) haplotypes at the index SNP (open circle). Darker colors and thicker lines indicate higher haplotype frequencies. Haplotypes extend 100 sites in each direction from the index SNP.

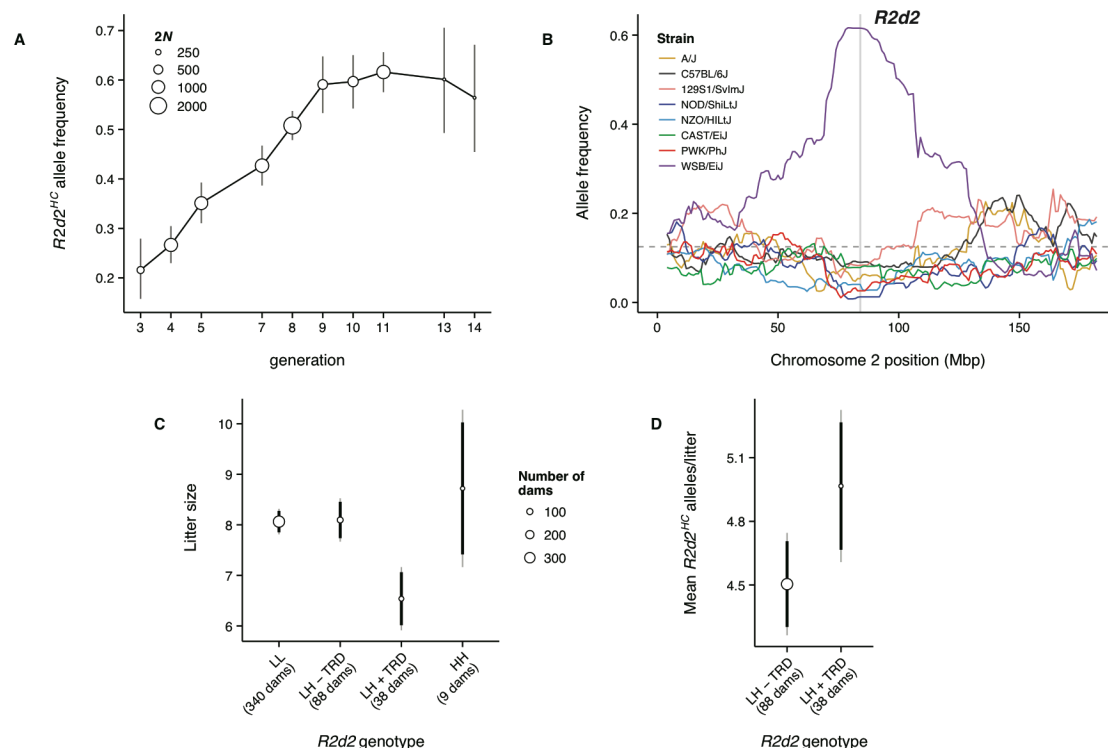

**Figure 2. An *R2d2*<sup>HC</sup> allele rises to high frequency despite negative effect on litter size in the DO. (A)** *R2d2* drives three-fold increase in WSB/EiJ allele frequency in 13 generations in the DO population. Circle sizes reflect number of chromosomes genotyped (2N); error bars are  $\pm 2$  SE. **(B)** Allele frequencies across Chromosome 2 (averaged in 1 Mb bins) at generation 13 of the DO, classified by founder strain. Grey shaded region is the candidate interval for *R2d2*. **(C)** Mean litter size among DO females according to *R2d2* genotype: LL, *R2d2*<sup>LC/LC</sup>; LH - TRD, *R2d2*<sup>LC/HC</sup> without transmission ratio distortion; LH + TRD, *R2d2*<sup>LC/HC</sup> with transmission ratio distortion; HH, *R2d2*<sup>HC/HC</sup>. Circle sizes reflect number of females tested; error bars are 95% confidence intervals from a linear mixed model which accounts for parity and repeated measures on the same female (see **Online Methods**.) **(D)** Mean absolute number of *R2d2*<sup>HC</sup> alleles

transmitted in each litter by heterozygous females with (LL + TRD) or without (LL – TRD) transmission ratio distortion. LL + TRD females transmit more  $R2d2^{HC}$  alleles despite their significantly reduced litter size.

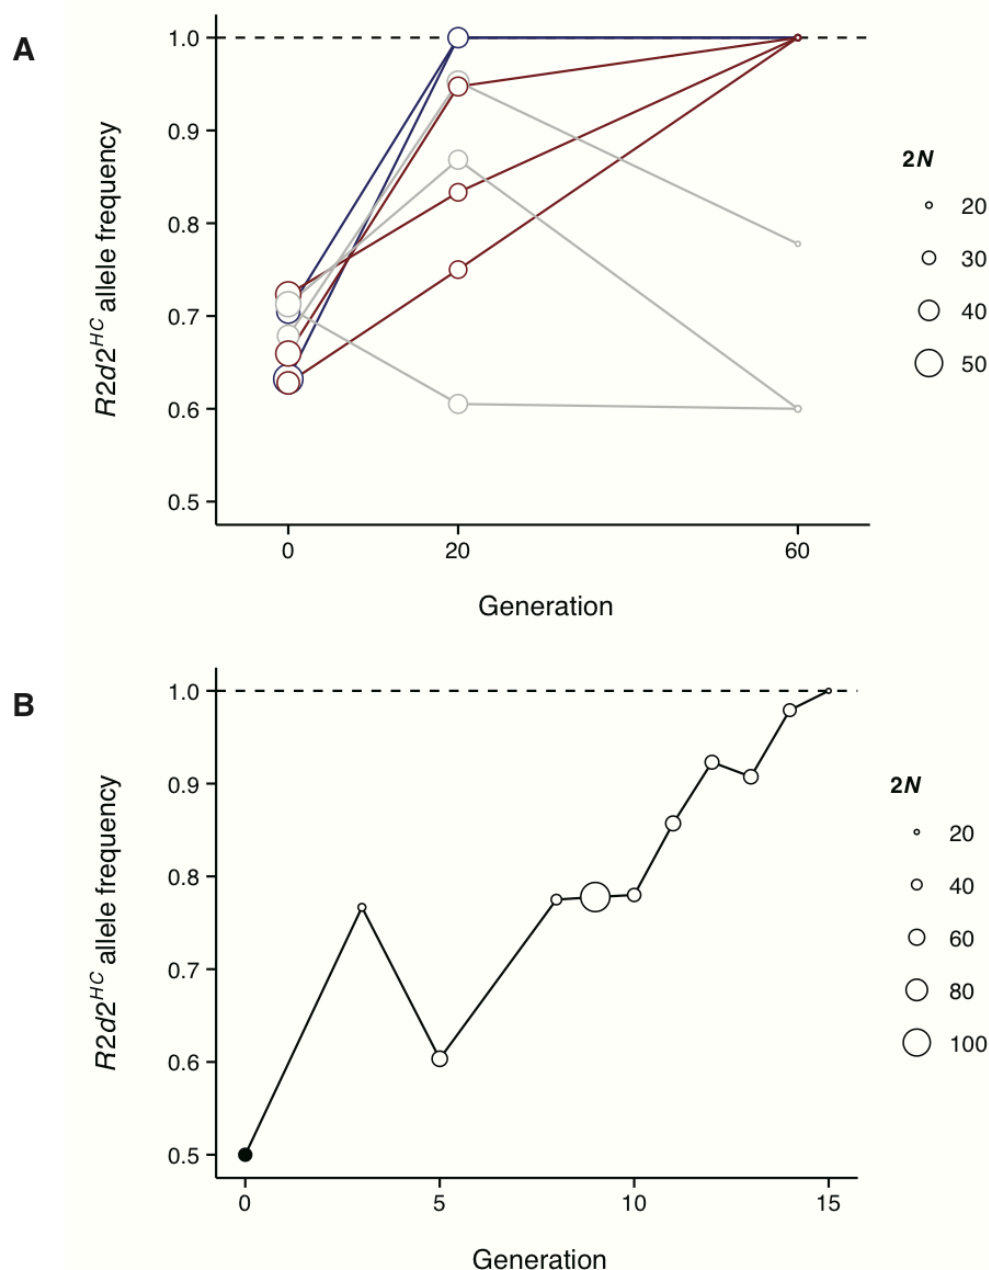

**Figure 3.  $R2d2^{HC}$  alleles rapidly increase in frequency in ICR:Hsd-derived laboratory populations. (A)**  $R2d2^{HC}$  allele frequency during breeding of 4 HR selection lines and 4 control lines. Trajectories are colored by their fate: blue,  $R2d2^{HC}$  fixed by generation 20; red,  $R2d2^{HC}$  fixed by generation 60; grey,  $R2d2^{HC}$  not fixed. Circle sizes reflect number of chromosomes ( $2N$ ) genotyped. **(B)**

*R2d2<sup>HC</sup>* allele frequency during breeding of an (HR8xC57BL/6J) advanced intercross line. Circle sizes reflect number of chromosomes (2*N*) genotyped.

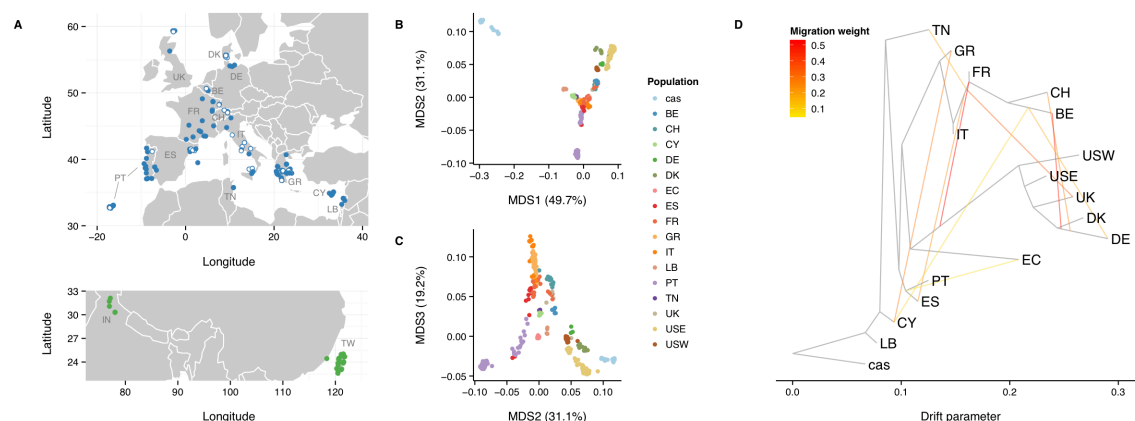

# Supplementary Fig. 1. Wild mouse populations used in this study. (A)

Geographic distribution of samples used in this study. Samples are colored by taxonomic origin: blue for *M. m. domesticus*, green for *M. m. castaneus*. Those with standard karyotype ( $2n = 40$ ) are indicated by closed circles; samples with Robertsonian fusion karyotypes ( $2n < 40$ ) are indicated by open circles. Populations from Floreana Island (Galapagos Islands, Ecuador; "EC"), Farallon Island (off the coast of San Francisco, California, United States; "USW"), and Maryland, United States ("USE") are not shown. **(B,C)** Multidimensional scaling (MDS) ( $k = 3$  dimensions) reveals population stratification consistent with geography. *M. m. domesticus* populations are labeled by country of origin. Outgroup samples of *M. m. castaneus* origin are combined into a single cluster ("cas"). **(D)** Population graph estimated from autosomal allele frequencies by TreeMix. Black edges indicate ancestry, while red edges indicate gene flow by migration or admixture. Topography of the population graph is consistent with MDS result and with the geographic origins of the samples.

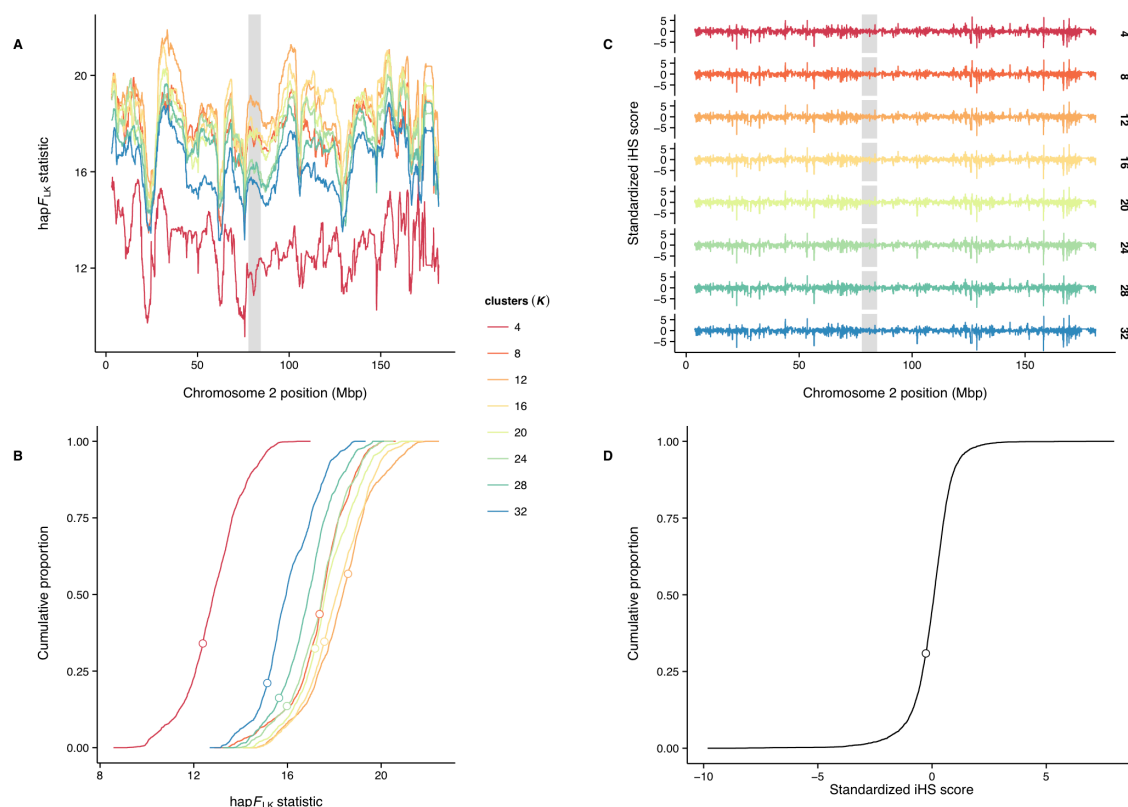

**Supplementary Fig. 2. Tests for selection based on population differentiation and haplotype length do not detect sweeps at *R2d2*.** (A) Plot of hapFLK statistic along Chromosome 2, for a range of values of the model parameter  $K$  (number of local haplotype clusters). (B) Cumulative distribution of hapFLK across autosomes, for a range of values of  $K$ . Value of the statistic at *R2d2* is indicated by open circle. (C) Plot of standardized iHS score along Chromosome 2 after phasing with fastPHASE, for a range of values of  $K$ . (D) Cumulative distribution of standardized iHS scores across autosomes after fastPHASE with  $K = 12$ . Value of the statistic at *R2d2* is indicated by open circle.

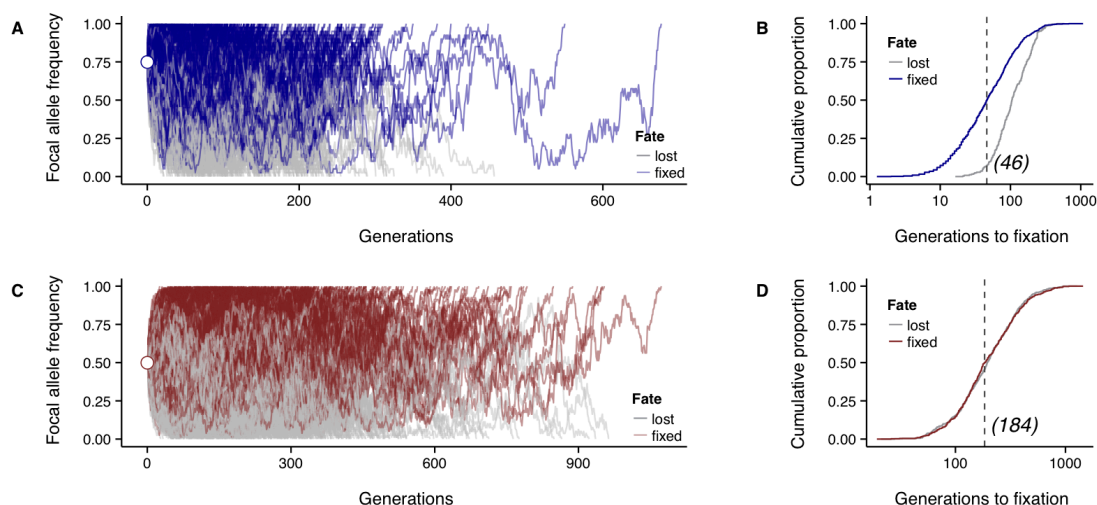

**Supplementary Fig. 3. Simulations of closed breeding populations under Mendelian segregation. (A)** Frequency trajectories of focal allele in 1,000 simulations of an intercross line mimicking the HR breeding scheme, colored according to fate (blue if focal allele fixed; grey if lost). Open circle indicates initial frequency of the focal allele. **(B)** Cumulative distribution of time to fixation (blue) or loss (grey) of the focal allele. Dotted line indicates median fixation time. **(C)** Frequency trajectories of focal allele in 1,000 simulations of an advanced intercross line mimicking the HR8xC57BL/6J AIL, colored according to fate (red if focal allele fixed; grey if lost). Open circle indicates initial frequency of the focal allele. **(D)** Cumulative distribution of time to fixation (red) or loss (grey) of the focal allele. Dotted line indicates median fixation time.



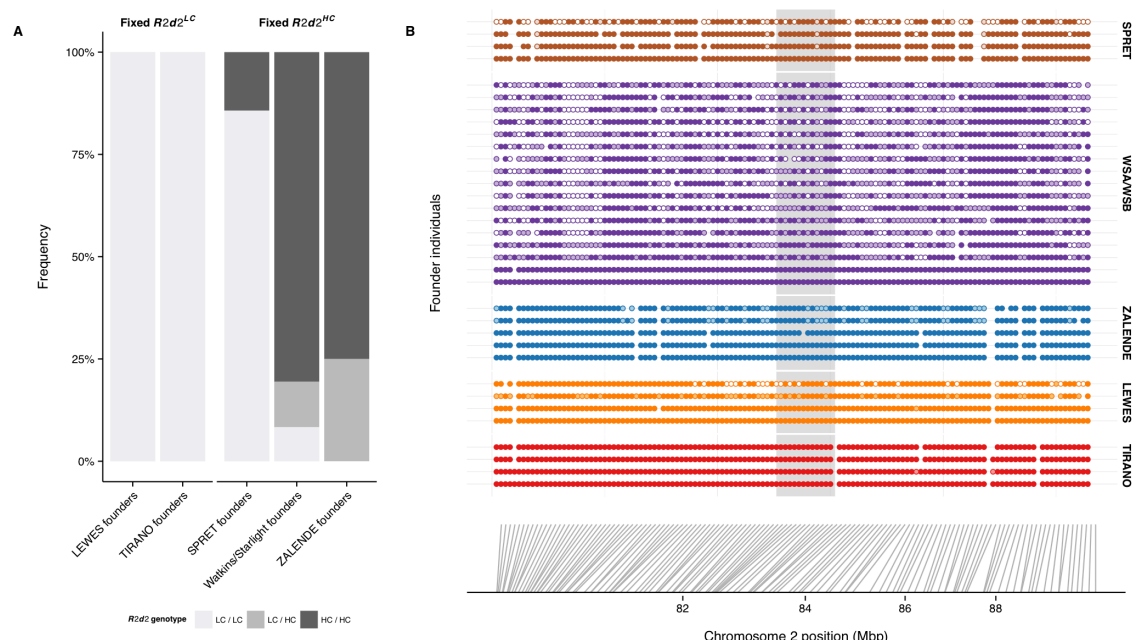

**Supplementary Fig. 4. Multiple wild-derived inbred lines have fixed  $R2d2^{HC}$  alleles that were segregating in founder populations. (A)**  $R2d2$  genotype frequencies in available ancestors of wild-derived inbred lines, determined by qPCR (see **Online Methods** and **Supplementary Fig. 7**). **(B)** Genotypes at markers on the MegaMUGA array (see **Online Methods**) in the region Chromosome 2: 80 Mb – 90 Mb for founder individuals of the SPRE/EiJ (brown), ZALENDE/EiJ (blue), LEWES/EiJ (orange) or TIRANO/EiJ (red) inbred lines. For WSB/EiJ (purple), genotypes are from present-day wild individuals from the township of Centreville, Maryland. Genotypes are coded by identity-by-state (IBS) to the respective inbred line: dark circles, homozygous for allele fixed in inbred line; light circles, heterozygous; open circles, homozygous for alternative allele.  $R2d2$  candidate region is indicated by grey shaded region. This panel demonstrates that the founders of lines which fixed  $R2d2^{HC}$  were most likely segregating for  $R2d2$ .

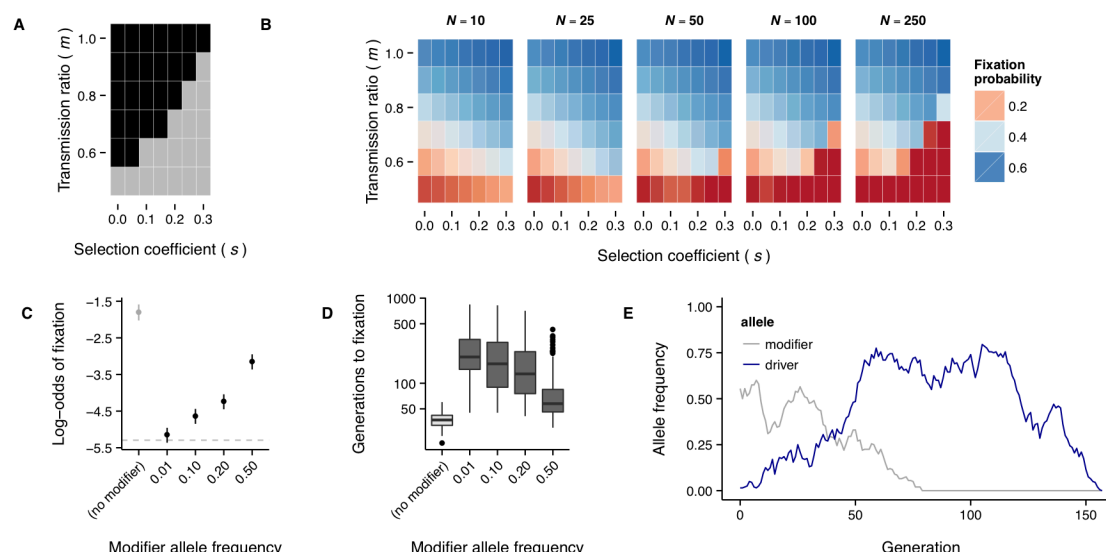

# **Supplementary Fig. 5. Population dynamics of a meiotic drive allele. (A)**

Phase diagram for a meiotic drive system like *R2d2*, with respect to transmission ratio ( $m$ ) and selection coefficient against the heterozygote ( $s$ ). Regions of the parameter space for which there is directional selection for the driving allele are shown in black; regions in which there are unstable equilibria or directional selection against the driving allele are shown in grey. **(B)** Probability of fixing the driving allele as a function of  $m$ ,  $s$  and population size ( $N$ ). Notice that, in the area corresponding to the grey region of panel A, fixation probability declines rapidly as population size increases. **(C)** Probability of fixing the driving allele in simulations of meiotic drive dependent on a single modifier locus ( $N = 100$ ,  $s = 0.2$ , maximum  $m = 0.8$ , initial driver frequency  $1/2N$ ). Estimates are given  $\pm 2$  SE. Grey dashed line corresponds to fixation probability for a neutral allele ( $1/2N$ ). **(D)** Time to fixation of the driving allele. Values represent 100 fixation events in each condition. **(E)** Example allele-frequency trajectories from a “collapsed” selfish sweep: while the modifier allele is present at intermediate

frequency, the driving allele sweeps to a frequency of  $\sim 0.75$ . After the modifier allele is lost, the driver drifts out of the population as well.

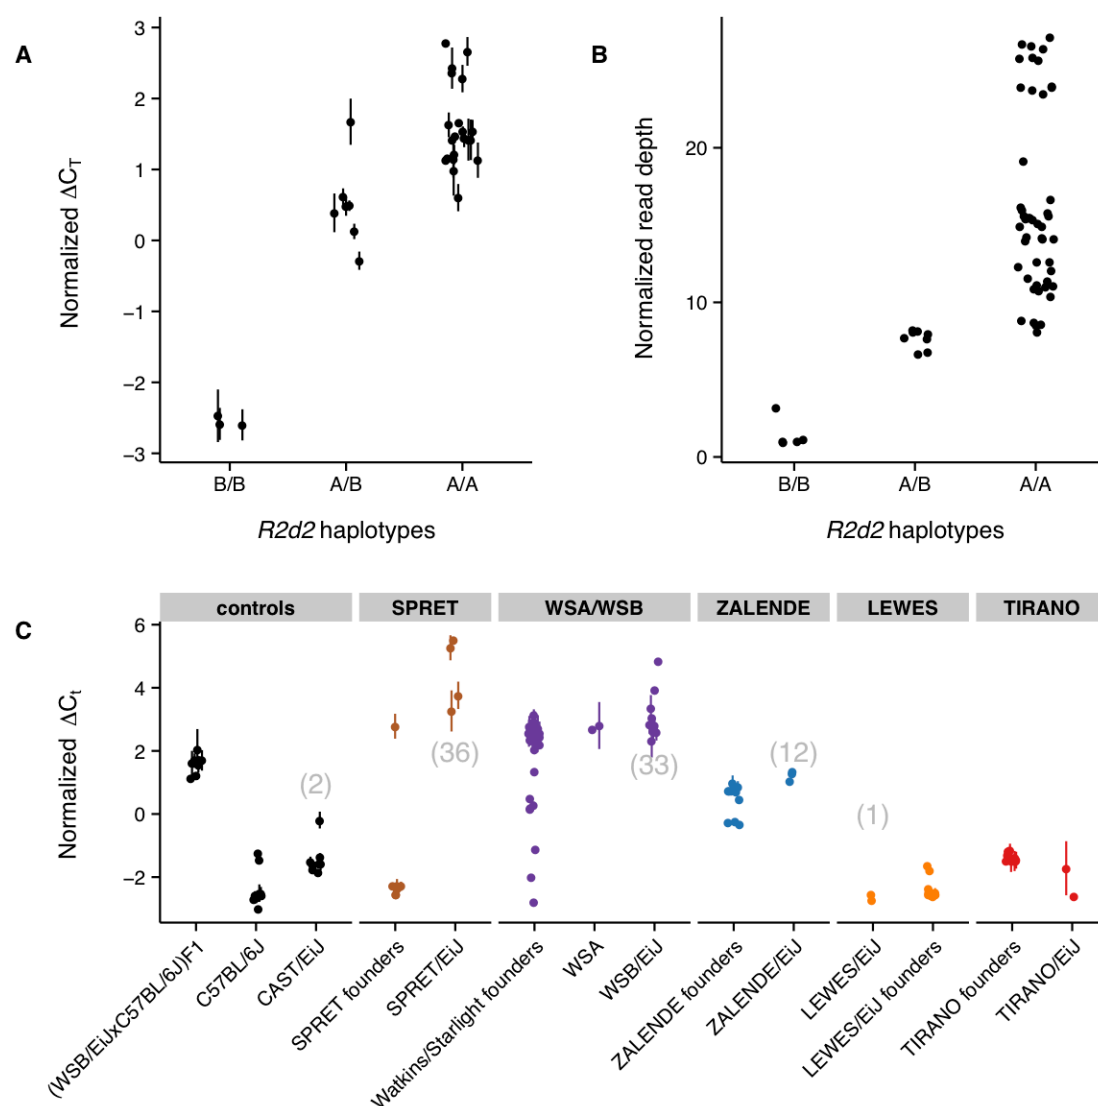

**Supplementary Fig. 6. Characterization of *Cwc22* qPCR assays. (A)**

Concordance between local haplotype and qPCR in HR lines. Normalized  $\Delta C_t$  from qPCR assay against *Cwc22* versus local haplotype at Chromosome 2: 83 Mb ( $A = R2d2^{LC}$ ,  $B = R2d2^{HC}$ ) in HR generation +61 individuals. Error bars represent mean  $\pm$  1 SD over technical replicates, when present. **(B)** Normalized read depth at *R2d2* in whole-genome sequencing versus local haplotype. **(C)** *R2d2* copy number of wild-derived inbred mouse lines and available ancestors,

estimated by qPCR. Samples listed as “control” are included as internal calibration points. For inbred strains that have been sequenced (CAST/EiJ, SPRET/EiJ, WSB/EiJ, ZALLENDE/EiJ, LEWES/EiJ) copy numbers estimated from depth of coverage are indicated in parentheses.

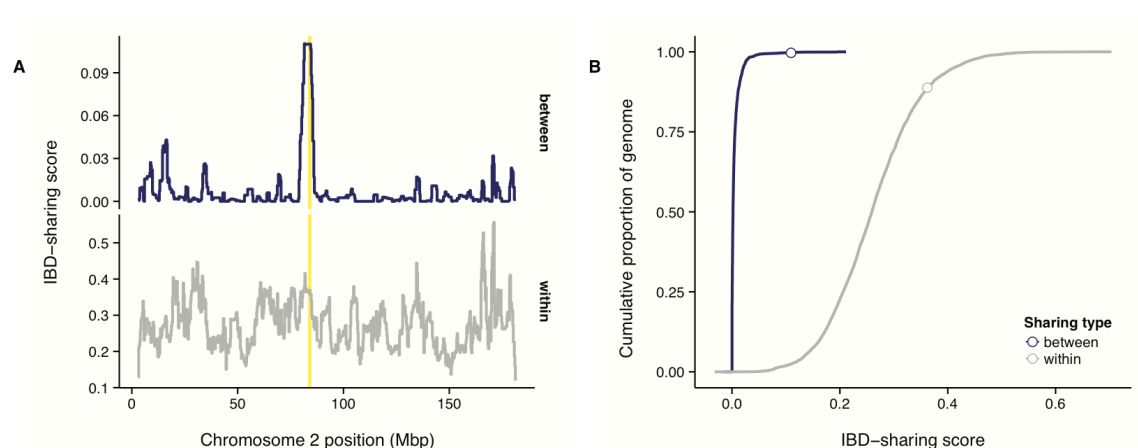

**Supplementary Fig. 7. Haplotype-sharing on Chromosome 2 among wild mice of European origin. (A)** Weighted haplotype-sharing score (see **Methods**), computed in 500 kb bins across Chromosome 2, when those individuals are drawn from the same population (grey line, lower panel) or different populations (blue line, upper panel). Candidate interval for *R2d2* is indicated by yellow shaded region. This panel is a magnified view of **Figure 1A**. **(B)** Cumulative distribution of IBD-sharing probability across all autosomes either within (grey line) or between (blue line) populations. Open circles indicate value at *R2d2*.

## Supplementary Tables

**Supplementary Table 1. Wild mice used in this study ( $n = 500$ ).** Column legend is as follows. **Taxon**: “Cas” (*M. m. castaneus*), “Dom” (*M. m. domesticus*). **Countries** are denoted using ISO 2166 standard 2-letter codes. **(Chromosomal) Races** follow the nomenclature of<sup>47</sup>. **TaqMan mean, SD**: mean and standard deviation of normalized  $\Delta C_t$  from qPCR assay(s) performed on this sample. **TaqMan target**: 1 (assay Mm00053048\_cn) or 2 (assay Mm00644079\_cn). **R2d2 zygosity**: “het”, sample is heterozygous at one or more markers in the *R2d2* candidate interval; “hom”, sample is homozygous at all markers in the *R2d2* candidate interval. **R2d2 genotype**: coded as number of chromosomes with an *R2d2*<sup>HC</sup> allele in this sample (0, 1 or 2). **Unrelated**: TRUE if this sample is a member of the subset of 396 unrelated mice. NA: data not available.

**Supplementary Table 2. *R2d2*<sup>HC</sup> allele frequencies in wild *M. m. domesticus* populations.**

**Supplementary Table 3. Diversity outbred mice used to determine *R2d2* allele frequencies.**

**Supplementary Table 4. Wild *M. m. domesticus* samples from Pezer et al. (2015) ( $n = 26$ ).** Column key is as follows. **Name**: sample name in this study. **Old name**: sample name used in Pezer et al. (2015). **Locality**: approximate trapping locations within indicated countries. **Cwc22 copy number**: Estimated diploid copy number of *Cwc22*, rounded to nearest integer, as reported in Supplementary Table 4 of Pezer et al. (2015). **R2d2 copy number**: copy-number

classification at *R2d2*, using *Cwc22* as proxy; “high” when  $>2$ , “low” otherwise.

***R2d2* hap 1**: inferred first haplotype at 3 SNPs across *R2d2* candidate interval;

alleles are coded as 1 = *R2d2*<sup>LC</sup>-associated, 2 = *R2d2*<sup>HC</sup>-associated. ***R2d2* hap**

**2**: inferred second haplotype across *R2d2*.
